# Supplementary material for: Growth factor-mediated augmentation of long bones: evaluation of a BMP-7 loaded thermoresponsive hydrogel in a murine femoral intramedullary injection model
Source: Springer Nature journal article supplement (doi:10.1186/s13018-019-1315-6), 2019-09-05
Supplement: MOESM1 [file 17142934]

|                        |                | 4 weeks     |             |             | 12 weeks    |             |             | Overall     |
|------------------------|----------------|-------------|-------------|-------------|-------------|-------------|-------------|-------------|
|                        |                | Sham        | BDI         | BMP-7       | Sham        | BDI         | BMP-7       |             |
| <b>trabecular bone</b> |                |             |             |             |             |             |             |             |
| BV/TV                  | distal femur   | 0.98 ± 0.26 | 1.24 ± 0.57 | 1.12 ± 0.27 | 1.04 ± 0.18 | 0.92 ± 0.28 | 0.88 ± 0.14 | 1.03 ± 0.32 |
|                        | proximal femur | 1.01 ± 0.30 | 0.82 ± 0.14 | 0.94 ± 0.26 | 0.86 ± 0.06 | 0.90 ± 0.16 | 0.83 ± 0.22 | 0.89 ± 0.21 |
|                        | femoral neck   | 0.85 ± 0.47 | 0.86 ± 0.67 | 1.29 ± 1.15 | 1.43 ± 0.98 | 1.00 ± 0.70 | 0.84 ± 0.37 | 1.03 ± 0.72 |
| TbTh                   | distal femur   | 1.01 ± 0.07 | 1.08 ± 0.22 | 1.05 ± 0.10 | 1.02 ± 0.07 | 0.96 ± 0.09 | 0.99 ± 0.05 | 1.02 ± 0.11 |
|                        | proximal femur | 0.99 ± 0.08 | 0.99 ± 0.09 | 0.92 ± 0.14 | 0.96 ± 0.11 | 0.88 ± 0.07 | 0.94 ± 0.09 | 0.95 ± 0.10 |
|                        | femoral neck   | 0.97 ± 0.41 | 0.83 ± 0.33 | 0.93 ± 0.24 | 1.74 ± 0.86 | 1.53 ± 1.19 | 0.85 ± 0.07 | 1.12 ± 0.70 |
| TbN                    | distal femur   | 0.97 ± 0.22 | 1.10 ± 0.29 | 1.05 ± 0.21 | 1.01 ± 0.13 | 0.95 ± 0.27 | 0.88 ± 0.11 | 0.99 ± 0.22 |
|                        | proximal femur | 1.00 ± 0.23 | 0.82 ± 0.12 | 1.02 ± 0.22 | 0.90 ± 0.20 | 1.02 ± 0.17 | 0.89 ± 0.26 | 0.94 ± 0.21 |
|                        | femoral neck   | 1.10 ± 0.66 | 0.79 ± 0.62 | 1.18 ± 0.86 | 1.18 ± 0.67 | 0.89 ± 0.55 | 1.01 ± 0.47 | 1.01 ± 0.60 |
| TbSp                   | distal femur   | 0.98 ± 0.08 | 1.04 ± 0.15 | 1.03 ± 0.06 | 1.01 ± 0.11 | 1.08 ± 0.15 | 1.16 ± 0.07 | 1.05 ± 0.12 |
|                        | proximal femur | 1.03 ± 0.12 | 1.07 ± 0.12 | 0.98 ± 0.09 | 1.09 ± 0.12 | 1.00 ± 0.10 | 1.06 ± 0.15 | 1.04 ± 0.12 |
|                        | femoral neck   | 0.91 ± 0.09 | 1.08 ± 0.13 | 0.91 ± 0.18 | 0.94 ± 0.13 | 1.00 ± 0.09 | 1.01 ± 0.09 | 0.97 ± 0.13 |

|       |                | 4 weeks     |             |             | 12 weeks    |             |             | Overall     |
|-------|----------------|-------------|-------------|-------------|-------------|-------------|-------------|-------------|
|       |                | Sham        | BDI         | BMP-7       | Sham        | BDI         | BMP-7       |             |
| TbDA  | distal femur   | 0.85 ± 0.10 | 0.99 ± 0.39 | 0.89 ± 0.19 | 0.87 ± 0.19 | 0.82 ± 0.25 | 1.02 ± 0.07 | 0.91 ± 0.22 |
|       | proximal femur | 1.06 ± 0.18 | 1.11 ± 0.30 | 0.93 ± 0.22 | 1.03 ± 0.14 | 0.97 ± 0.14 | 1.33 ± 0.28 | 1.07 ± 0.25 |
|       | femoral neck   | 0.54 ± 0.53 | 1.23 ± 1.47 | 4.49 ± 6.34 | 0.28 ± 0.11 | 0.88 ± 0.59 | 1.03 ± 0.96 | 1.38 ± 2.70 |
| TbBMD | distal femur   | 0.98 ± 0.11 | 1.01 ± 0.16 | 0.98 ± 0.13 | 0.97 ± 0.07 | 0.94 ± 0.10 | 0.87 ± 0.06 | 0.96 ± 0.11 |
|       | proximal femur | 0.98 ± 0.16 | 0.90 ± 0.09 | 0.91 ± 0.19 | 0.82 ± 0.10 | 0.90 ± 0.15 | 0.86 ± 0.15 | 0.90 ± 0.14 |
|       | femoral neck   | 1.10 ± 0.37 | 0.91 ± 0.16 | 1.08 ± 0.31 | 1.20 ± 0.52 | 1.07 ± 0.29 | 0.98 ± 0.20 | 1.05 ± 0.31 |

|                      |                | 4 weeks     |             |             | 12 weeks    |             |             | Overall     |
|----------------------|----------------|-------------|-------------|-------------|-------------|-------------|-------------|-------------|
|                      |                | Sham        | BDI         | BMP-7       | Sham        | BDI         | BMP-7       |             |
| <b>cortical bone</b> |                |             |             |             |             |             |             |             |
| BAr/TAr              | diaphysis      | 1.02 ± 0.11 | 1.02 ± 0.10 | 0.94 ± 0.08 | 0.91 ± 0.14 | 0.98 ± 0.11 | 1.01 ± 0.08 | 0.98 ± 0.10 |
|                      | proximal femur | 1.06 ± 0.09 | 1.07 ± 0.05 | 0.98 ± 0.09 | 1.02 ± 0.07 | 1.13 ± 0.12 | 0.94 ± 0.10 | 1.03 ± 0.11 |
|                      | femoral neck   | 1.06 ± 0.28 | 1.14 ± 0.10 | 1.07 ± 0.16 | 1.19 ± 0.23 | 1.14 ± 0.18 | 1.07 ± 0.15 | 1.11 ± 0.18 |
| CtTh                 | diaphysis      | 1.01 ± 0.08 | 0.99 ± 0.04 | 0.99 ± 0.04 | 0.96 ± 0.06 | 1.00 ± 0.07 | 1.02 ± 0.05 | 1.00 ± 0.06 |
|                      | proximal femur | 1.02 ± 0.01 | 1.00 ± 0.06 | 0.98 ± 0.04 | 1.02 ± 0.05 | 1.01 ± 0.05 | 0.99 ± 0.05 | 1.00 ± 0.05 |
|                      | femoral neck   | 1.04 ± 0.11 | 0.99 ± 0.07 | 0.98 ± 0.04 | 1.01 ± 0.04 | 0.88 ± 0.23 | 0.99 ± 0.03 | 0.98 ± 0.12 |
| CtBMD                | diaphysis      | 1.02 ± 0.04 | 0.98 ± 0.04 | 0.99 ± 0.06 | 0.98 ± 0.02 | 1.01 ± 0.05 | 0.96 ± 0.02 | 0.99 ± 0.04 |
|                      | proximal femur | 1.03 ± 0.02 | 1.00 ± 0.03 | 0.99 ± 0.03 | 0.99 ± 0.03 | 1.02 ± 0.04 | 0.97 ± 0.02 | 1.00 ± 0.03 |
|                      | femoral neck   | 1.05 ± 0.04 | 1.15 ± 0.33 | 0.98 ± 0.07 | 0.96 ± 0.03 | 1.00 ± 0.04 | 0.96 ± 0.04 | 1.02 ± 0.14 |
